# Supplementary material for: Pyrrolidine-Derived Phenanthroline Diamides: An Influence of Fluorine Atoms on the Coordination of Lu(III) and Some Other f-Elements and Their Solvent Extraction
Source: MDPI journal article supplement (doi:10.3390/ijms24065569), 2023-03-14
Supplement: s1 [file s1]

# **Pyrrolidine derived phenanthroline diamides: an influence of fluorine atoms on the coordination of Lu(III) and some other f-elements and their solvent extraction**

**Nane A. Avagyan,<sup>1</sup> Pavel S. Lemport,<sup>1</sup> Mariia V. Evsiunina,<sup>1</sup> Petr I. Matveev,<sup>1</sup> Svetlana A. Aksenova,<sup>2,3</sup>  
Yulia V. Nelyubina,<sup>2</sup> Alexandr V. Yatsenko,<sup>1</sup> Viktor A. Tafeenko,<sup>1</sup> Vladimir G. Petrov,<sup>1</sup> Yuri A.  
Ustynyuk,<sup>1</sup> Xihe Bi,<sup>4</sup> Valentine G. Nenajdenko<sup>1\*</sup>**

<sup>1</sup> Department of Chemistry, Lomonosov Moscow State University, Leninskie gory 1 bld. 3, Moscow, Russia; <sup>2</sup> A.N. Nesmeyanov Institute of Organoelement Compounds, Russian academy of Sciences, 119334, Moscow, Russia

<sup>3</sup> Moscow Institute of Physics and Technology, National Research University, Institutskiy per. 9, Dolgoprudny, 141700 Moscow Region, Russia

<sup>4</sup> Department of Chemistry, Northeast Normal University, 5286 Renmin Street, 130024, Changchun, China

\* Correspondence to: nenajdenko@gmail.com

## **Table of contents**

|                                                     |       |
|-----------------------------------------------------|-------|
| 1. NMR and IR spectra of synthesized compounds..... | S2-S7 |
| 2. X-ray analysis data .....                        | S8    |
| 3. Spectrophotometric titration.....                | S9    |

## 1. NMR and IR spectra of synthesized compounds

**N<sup>2</sup>,N<sup>9</sup>-bis(pyrrolidine)-N<sup>2</sup>,N<sup>9</sup>-diethyl-1,10-phenanthroline-2,9-dicarboxamide lutetium trinitrate L1\*Lu(NO<sub>3</sub>)<sub>3</sub>**

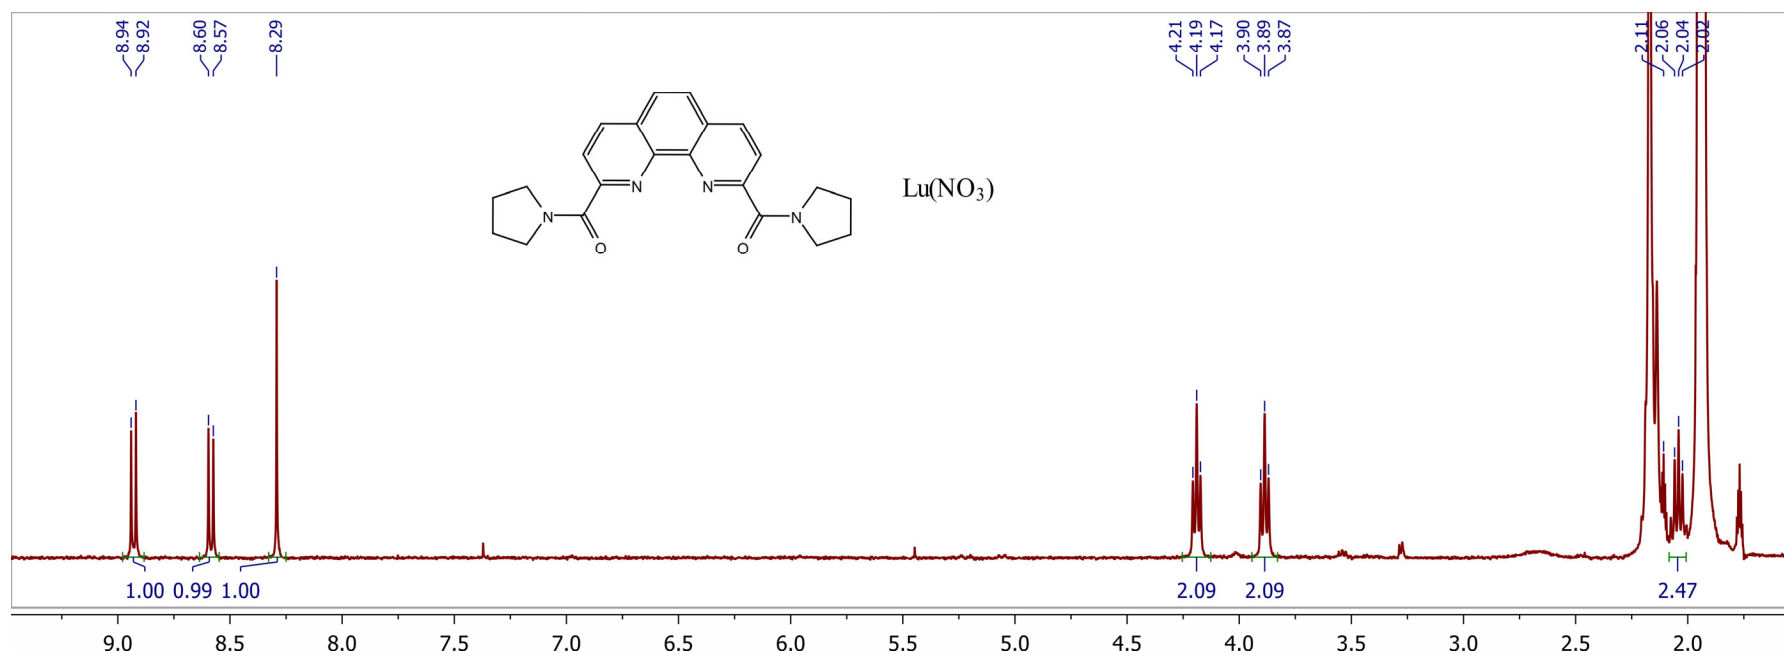

**Figure S1.** <sup>1</sup>H NMR spectrum of **L1\*Lu(NO<sub>3</sub>)<sub>3</sub>** in CD<sub>3</sub>CN at 25°C

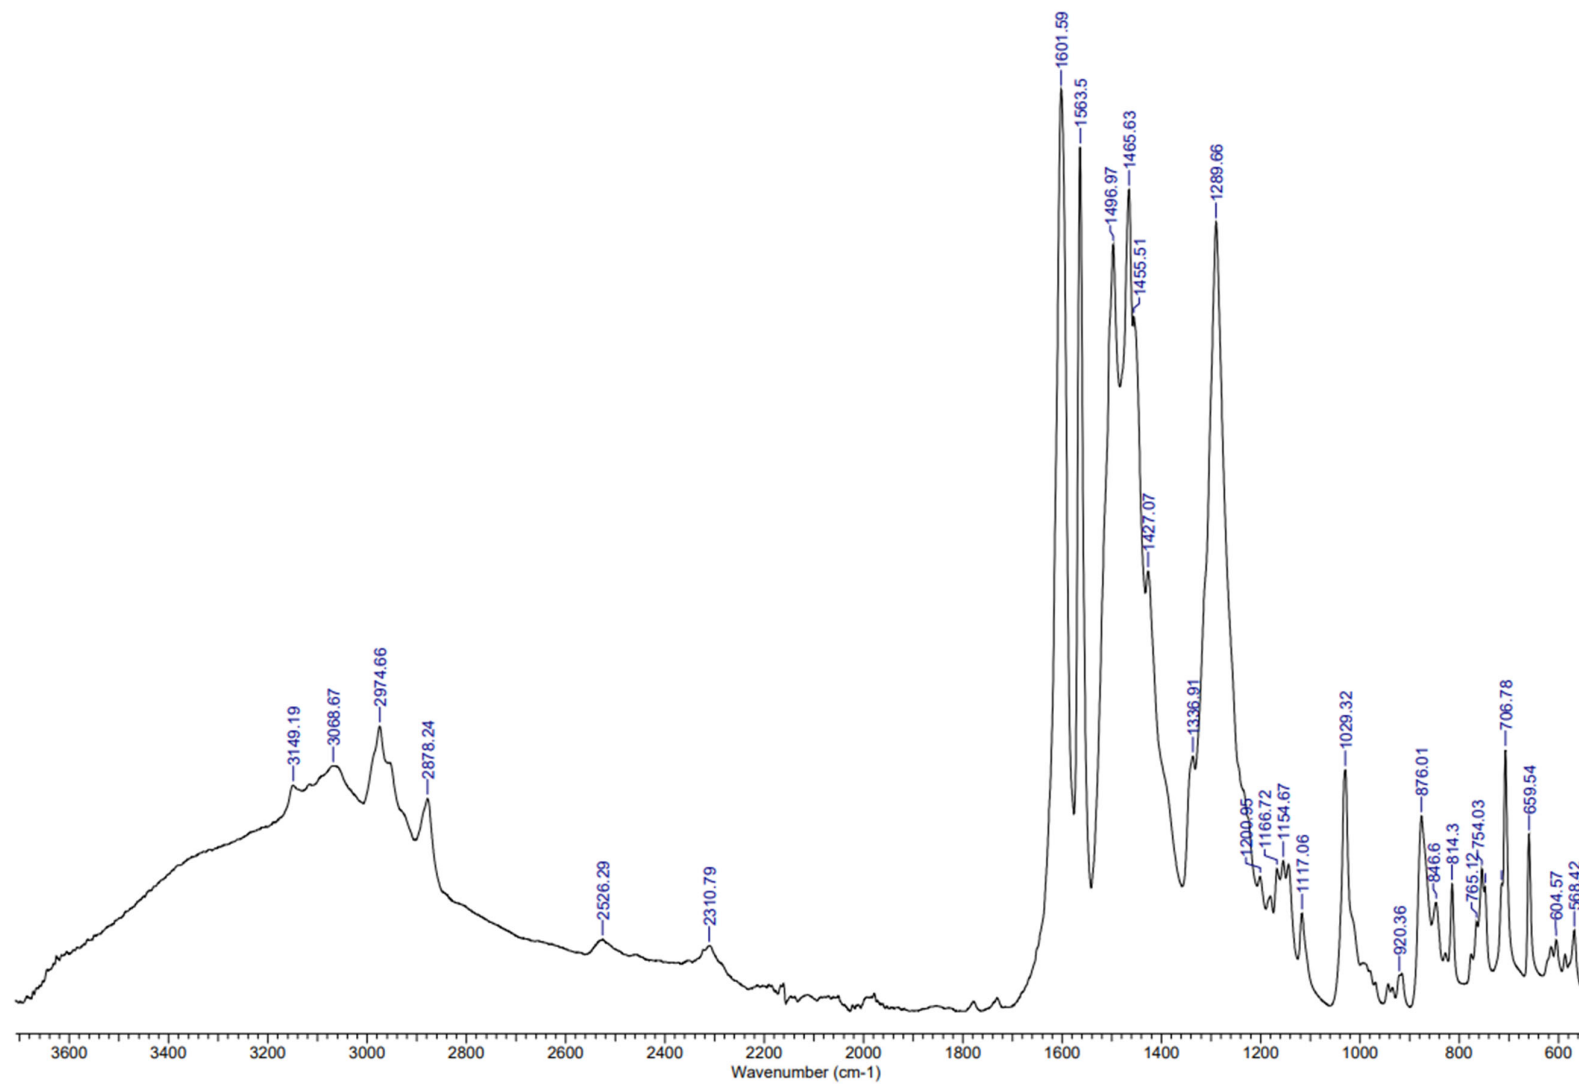

**Figure S2.** Solid-state IR of  $L1*Lu(NO_3)_3$  spectrum at 25°C

**N<sup>2</sup>,N<sup>9</sup>-bis(pyrrolidine)-4,7-dichloro-N<sup>2</sup>,N<sup>9</sup>-diethyl-1,10-phenanthroline-2,9-dicarboxamide lutetium trinitrate L2\*Lu(NO<sub>3</sub>)<sub>3</sub>**

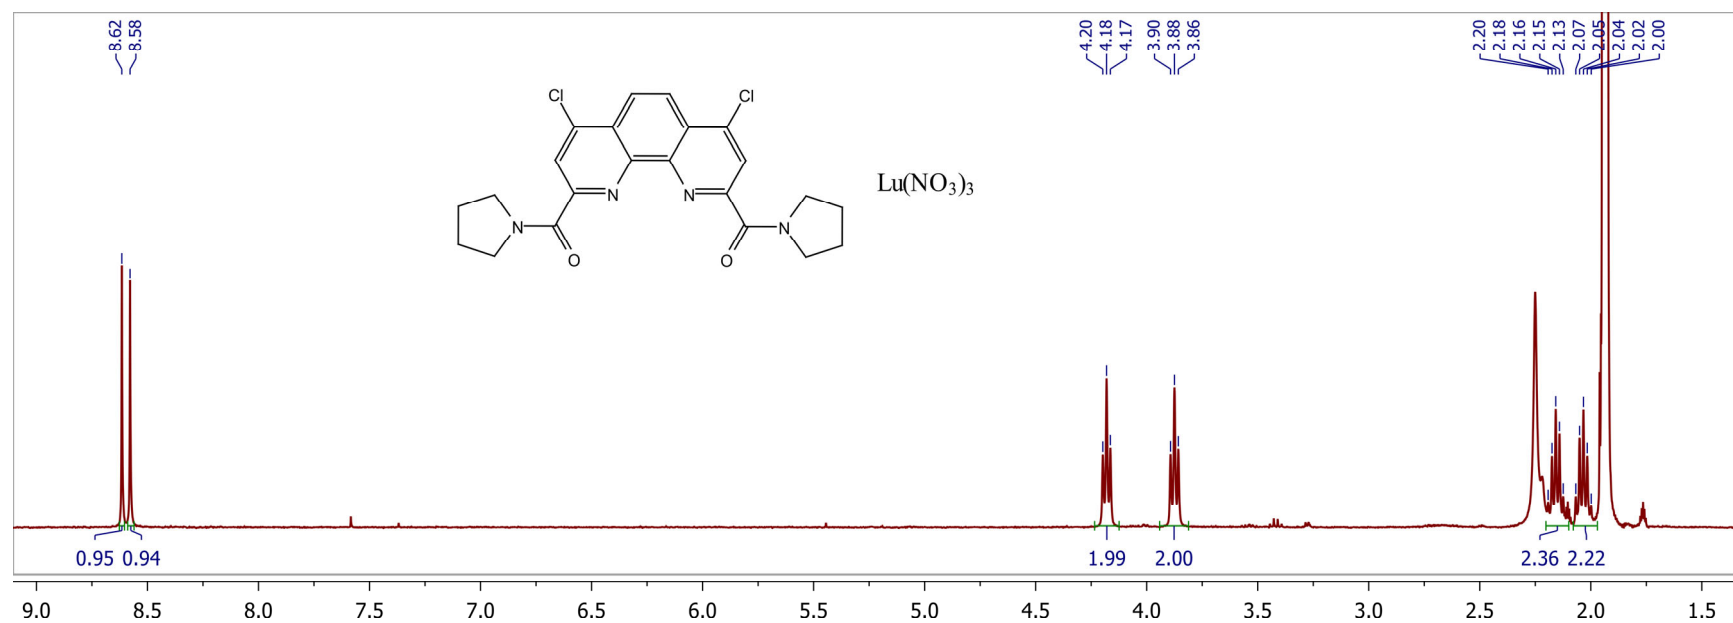

**Figure S3.** <sup>1</sup>H NMR spectrum of **L2\*Lu(NO<sub>3</sub>)<sub>3</sub>** in CD<sub>3</sub>CN at 25°C

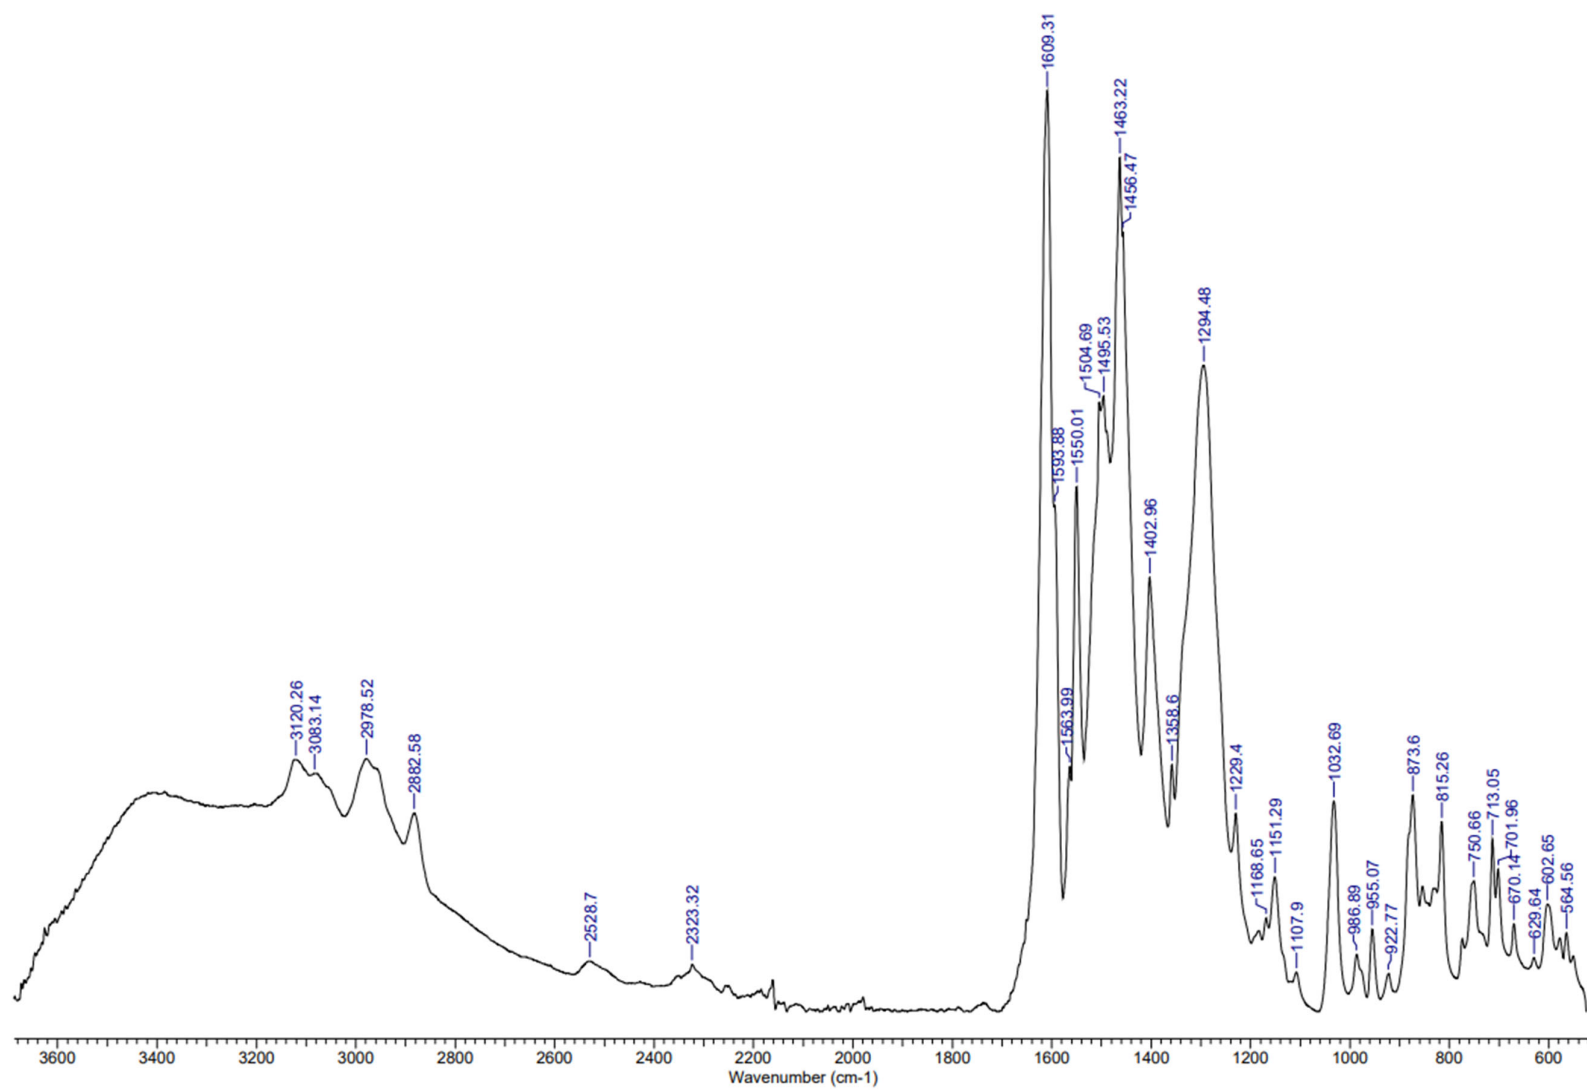

**Figure S4.** Solid-state IR spectrum of  $\text{L2*Lu(NO}_3)_3$  at 25°C

**N<sup>2</sup>,N<sup>9</sup>-bis(pyrrolidine)-4,7-difluoro-N<sup>2</sup>,N<sup>9</sup>-diethyl-1,10-phenanthroline-2,9-dicarboxamide lutetium trinitrate L3\*Lu(NO<sub>3</sub>)<sub>3</sub>**

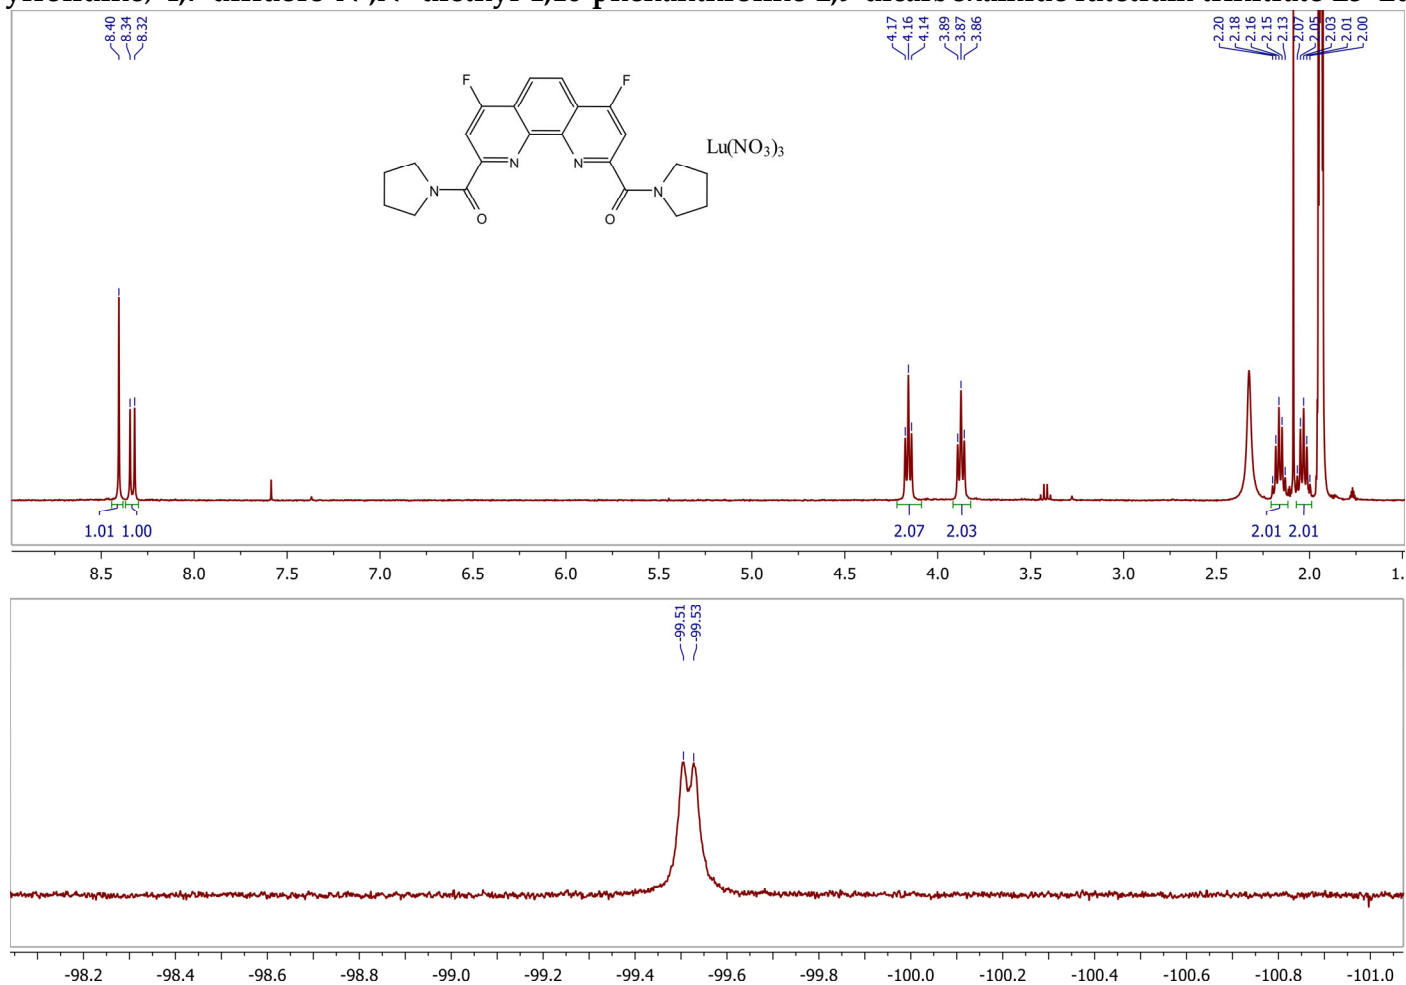

**Figure S5.** <sup>1</sup>H and <sup>19</sup>F NMR spectra of L3\*Lu(NO<sub>3</sub>)<sub>3</sub> in CD<sub>3</sub>CN at 25°C

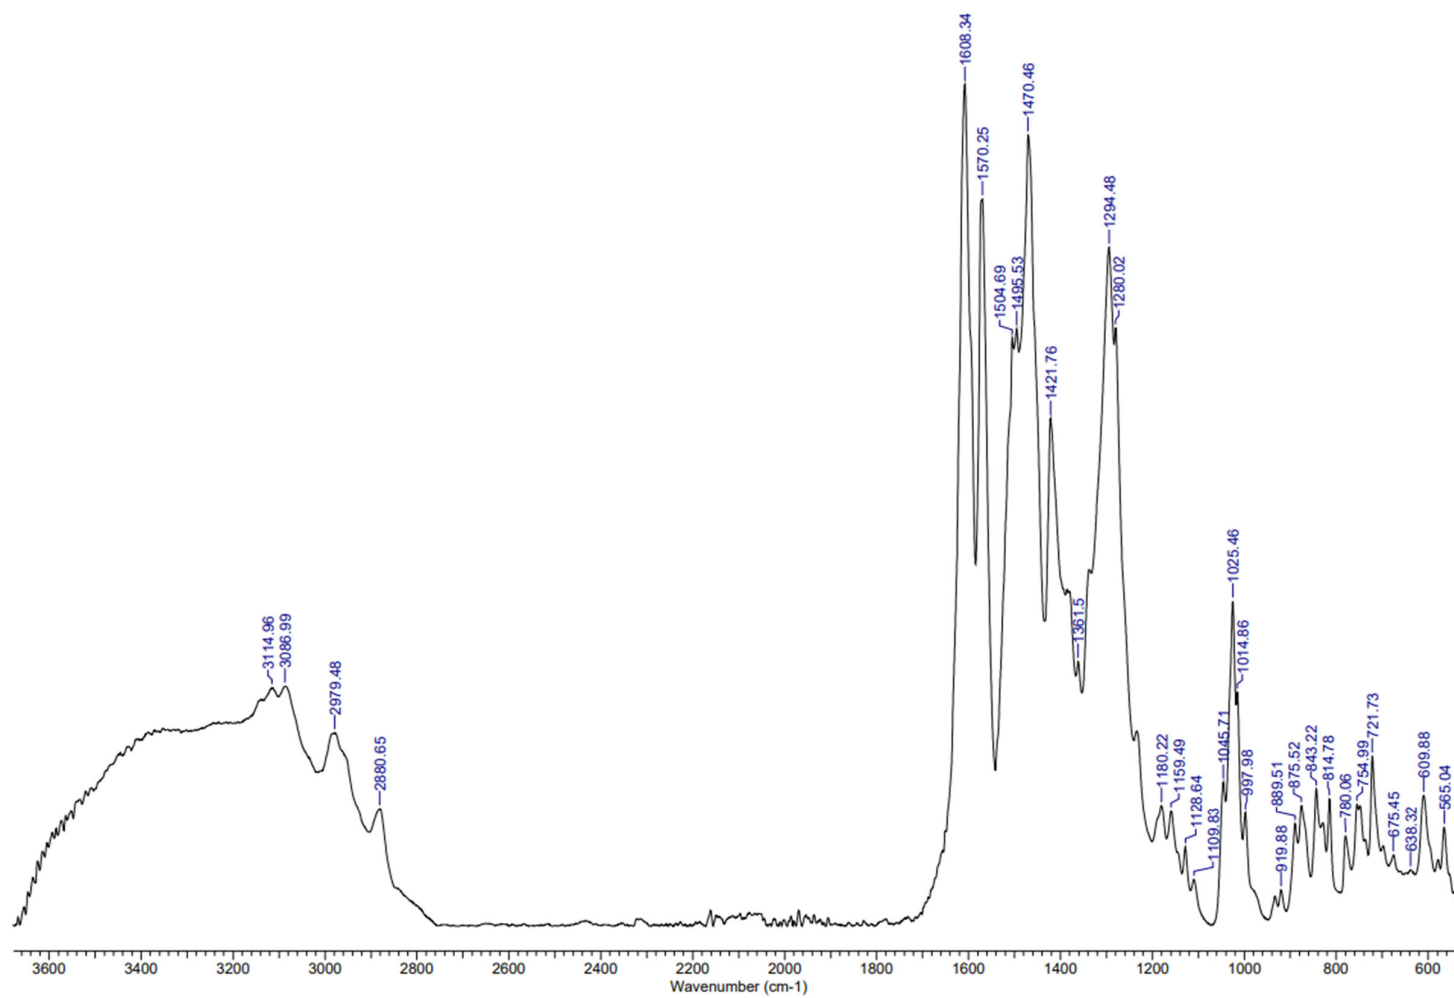

**Figure S6.** Solid-state IR spectrum of  $L3 \cdot Lu(NO_3)_3$  at 25°C

## X-ray analysis data

**Table S1.** Crystallographic data for the ligand **L3** and the complexes **L•Lu(NO<sub>3</sub>)<sub>3</sub>** and **(L3)<sub>3</sub>Lu<sub>3</sub>O<sub>2</sub>(NO<sub>3</sub>)<sub>5</sub>**.

|                                                          | <b>L3</b>                                                                    | <b>L1•Lu(NO<sub>3</sub>)<sub>3</sub></b>                         | <b>L2•Lu(NO<sub>3</sub>)<sub>3</sub></b>                                         | <b>L3•Lu(NO<sub>3</sub>)<sub>3</sub></b>                                        | <b>(L3)<sub>3</sub>Lu<sub>3</sub>O<sub>2</sub>(NO<sub>3</sub>)<sub>5</sub></b>                 |
|----------------------------------------------------------|------------------------------------------------------------------------------|------------------------------------------------------------------|----------------------------------------------------------------------------------|---------------------------------------------------------------------------------|------------------------------------------------------------------------------------------------|
| Empirical formula                                        | C <sub>22</sub> H <sub>20</sub> F <sub>2</sub> N <sub>4</sub> O <sub>2</sub> | C <sub>22</sub> H <sub>24</sub> LuN <sub>7</sub> O <sub>12</sub> | C <sub>24</sub> H <sub>29</sub> Cl <sub>2</sub> LuN <sub>8</sub> O <sub>14</sub> | C <sub>24</sub> H <sub>23</sub> F <sub>2</sub> LuN <sub>8</sub> O <sub>11</sub> | C <sub>66</sub> H <sub>66</sub> F <sub>6</sub> Lu <sub>3</sub> N <sub>17</sub> O <sub>23</sub> |
| Formula weight                                           | 410.42                                                                       | 753.45                                                           | 899.42                                                                           | 812.47                                                                          | 2104.26                                                                                        |
| Temperature, K                                           | 295                                                                          | 295                                                              | 295                                                                              | 295                                                                             | 100                                                                                            |
| Crystal system                                           | Orthorhombic                                                                 | Monoclinic                                                       | Triclinic                                                                        | Monoclinic                                                                      | Orthorhombic                                                                                   |
| Space group                                              | P 2 <sub>1</sub> 2 <sub>1</sub> 2 <sub>1</sub>                               | P 2 <sub>1</sub> /n                                              | P -1                                                                             | P 2 <sub>1</sub> /c                                                             | P bcn                                                                                          |
| Z(Z')                                                    | 4 (1)                                                                        | 4 (1)                                                            | 2 (1)                                                                            | 4 (1)                                                                           | 4 (0.5)                                                                                        |
| a, Å                                                     | 8.3819(3)                                                                    | 8.32770(10)                                                      | 9.6408(4)                                                                        | 8.9589(4)                                                                       | 21.3714(4)                                                                                     |
| b, Å                                                     | 10.6432(3)                                                                   | 21.2957(5)                                                       | 9.7352(4)                                                                        | 16.5501(7)                                                                      | 18.6993(4)                                                                                     |
| c, Å                                                     | 22.0479(6)                                                                   | 15.1884(4)                                                       | 18.0401(6)                                                                       | 19.1104(9)                                                                      | 19.5530(4)                                                                                     |
| α, °                                                     | 90                                                                           | 90                                                               | 84.951(3)                                                                        | 90                                                                              | 90                                                                                             |
| β, °                                                     | 90                                                                           | 91.412(2)                                                        | 79.175(3)                                                                        | 90.760(4)                                                                       | 90                                                                                             |
| γ, °                                                     | 90                                                                           | 90                                                               | 73.680(3)                                                                        | 90                                                                              | 90                                                                                             |
| V, Å <sup>3</sup>                                        | 1966.90(10)                                                                  | 2692.76(10)                                                      | 1594.90(11)                                                                      | 2833.3(2)                                                                       | 7814.0(3)                                                                                      |
| D <sub>calc</sub> , g cm <sup>-3</sup>                   | 1.386                                                                        | 1.859                                                            | 1.873                                                                            | 1.905                                                                           | 1.789                                                                                          |
| μ, cm <sup>-1</sup>                                      | 8.72                                                                         | 77.03                                                            | 33.43                                                                            | 74.68                                                                           | 38.59                                                                                          |
| F(000)                                                   | 856                                                                          | 1488                                                             | 892                                                                              | 1600                                                                            | 4128                                                                                           |
| 2θmax, °                                                 | 134                                                                          | 134                                                              | 56                                                                               | 134                                                                             | 54                                                                                             |
| Reflections measured                                     | 13287                                                                        | 18334                                                            | 43553                                                                            | 20022                                                                           | 85879                                                                                          |
| Independent reflections (R <sub>int</sub> )              | 3377 (0.0517)                                                                | 4708 (0.0499)                                                    | 7533 (0.0616)                                                                    | 4989 (0.1151)                                                                   | 8510 (0.0426)                                                                                  |
| Observed reflections [ <i>I</i> > 2σ( <i>I</i> )]        | 2068                                                                         | 4007                                                             | 5297                                                                             | 2557                                                                            | 7308                                                                                           |
| Parameters                                               | 279                                                                          | 387                                                              | 470                                                                              | 417                                                                             | 591                                                                                            |
| R1 with <i>I</i> > 2σ( <i>I</i> )                        | 0.0333                                                                       | 0.0356                                                           | 0.0356                                                                           | 0.0435                                                                          | 0.0318                                                                                         |
| wR2 (all data)                                           | 0.0751                                                                       | 0.0984                                                           | 0.0522                                                                           | 0.0993                                                                          | 0.0922                                                                                         |
| GOF                                                      | 0.855                                                                        | 1.060                                                            | 0.836                                                                            | 0.808                                                                           | 1.091                                                                                          |
| Δρ <sub>max</sub> /Δρ <sub>min</sub> , e Å <sup>-3</sup> | 0.162/-0.116                                                                 | 0.751/-1.739                                                     | 0.966/-0.912                                                                     | 0.956/-1.336                                                                    | 2.299/-1.144                                                                                   |
| CCDC                                                     | 2221666                                                                      | 2221667                                                          | 2191901                                                                          | 2221670                                                                         | 2232270                                                                                        |



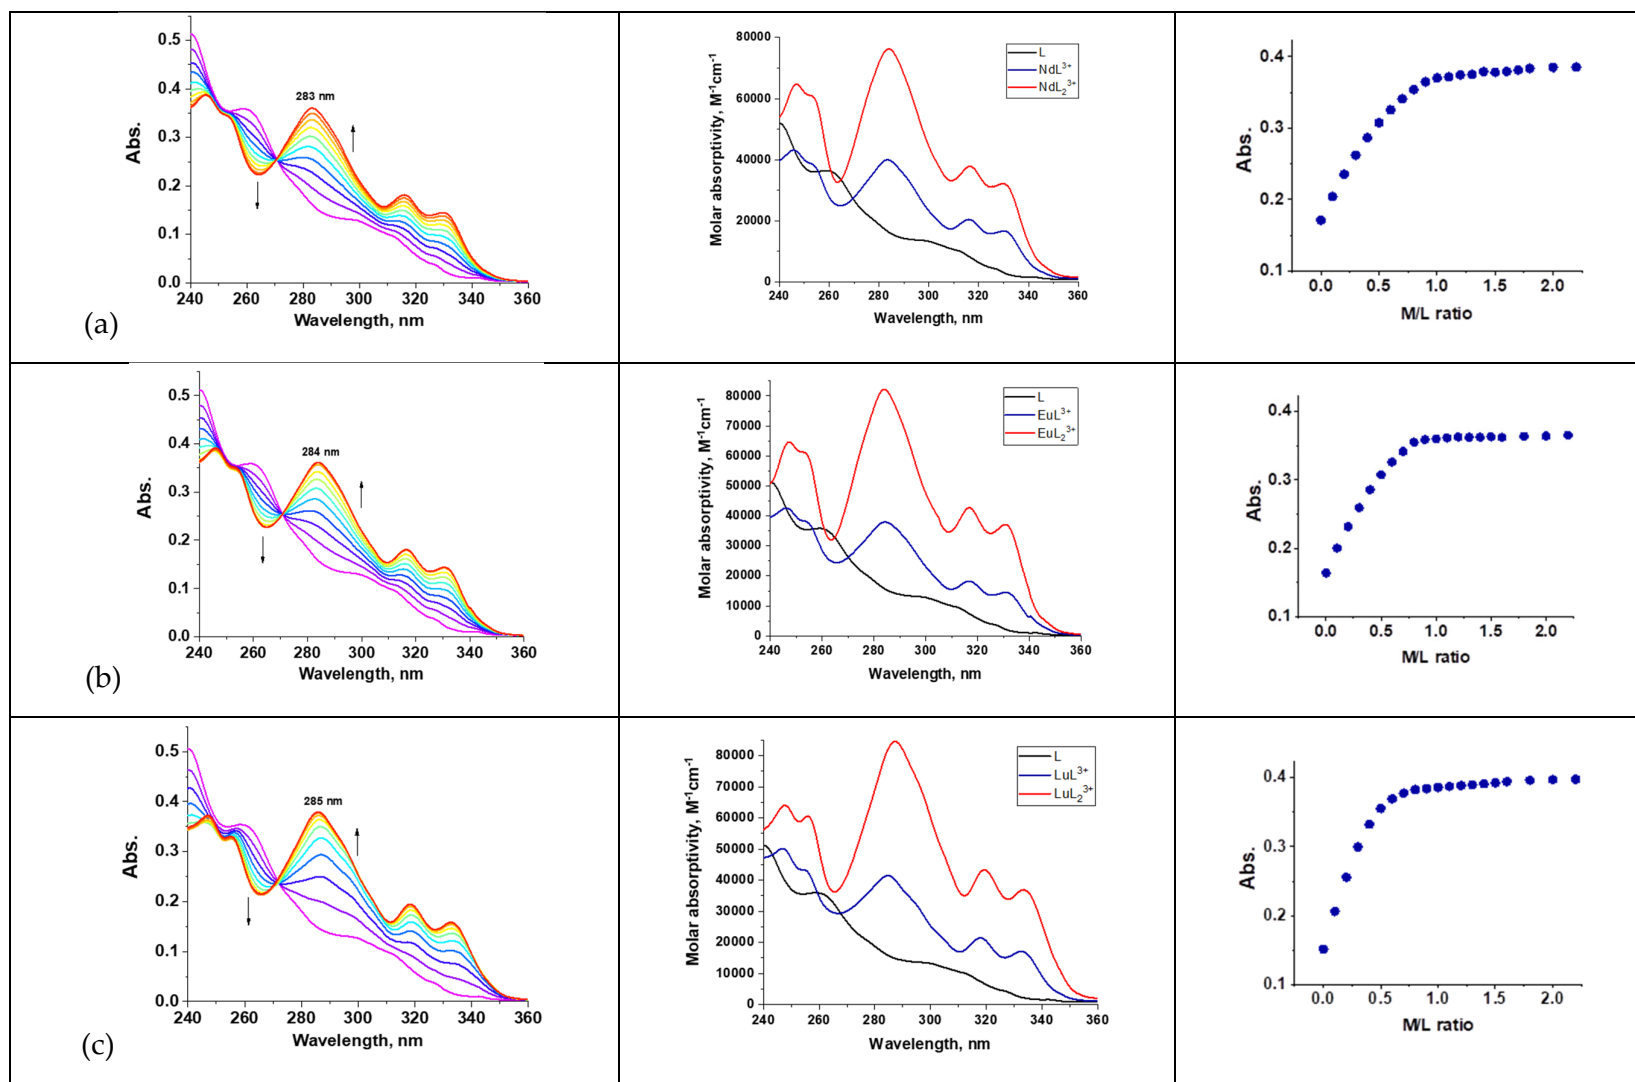

**Figure S7.** Spectrophotometric titration of L3 (ca.  $10^{-5}$  mol L $^{-1}$ ) with (a) Nd $^{3+}$ , (b) Eu $^{3+}$  and (c) Lu $^{3+}$  ions (ca.  $10^{-3}$  mol L $^{-1}$ ) in CH $_3$ CN solution (T =  $25.0 \pm 0.1$  °C, I = 0 M, V $_0$  = 2.0 mL). Left: absorption spectra; middle: the molar absorptivities of free ligand L3 and Ln(III) complexes calculated from spectral deconvolution; right: titration curve at maximum absorption wavelength
